# Supplementary material for: Comparison of traditional and new generation DNA markers declares high genetic diversity and differentiated population structure of wild almond species
Source: PubMed Central journal article supplement (PMC5519738; doi:10.1038/s41598-017-06084-4), 2017-07-20
Supplement: 41598_2017_6084_MOESM1_ESM.pdf [file 41598_2017_6084_MOESM1_ESM.pdf]

## Supplementary Figures

### Comparison of traditional and new generation DNA markers declares high genetic diversity and differentiated population structure of wild almond species

**Karim Sorkheh<sup>b1\*</sup>, Mehrana Koohi Dehkordi<sup>b2</sup>, Sezai Ercisli<sup>b3</sup>, Attila Hegedus<sup>4</sup> & Júlia Halász<sup>4</sup>**

<sup>1</sup>Department of Agronomy and Plant Breeding, Faculty of Agriculture, Shahid Chamran University of Ahvaz, P.O. Box 61355/144, Iran

<sup>2</sup>Department of Agronomy, Faculty of Agriculture, Payame-Noor University, P.O. Box 19395-3697, Tehran, Iran

<sup>3</sup>Department of Horticulture, Agricultural Faculty, Ataturk University, 25240 Erzurum, Turkey

<sup>4</sup>Department of Genetics and Plant Breeding, Szent István University, H-1118 Budapest, Villányiút29-43

<sup>b</sup>these authors contributed equally to this work.

**Corresponding author:** Prof. Dr. Karim Sorkheh  
Department of Agronomy and Plant Breeding, Faculty of Agriculture, Shahid Chamran University of Ahvaz, P.O. Box 61355/144, Iran  
E-mail address: karimsorkheh@gmail.com

## Supplementary Figure S1

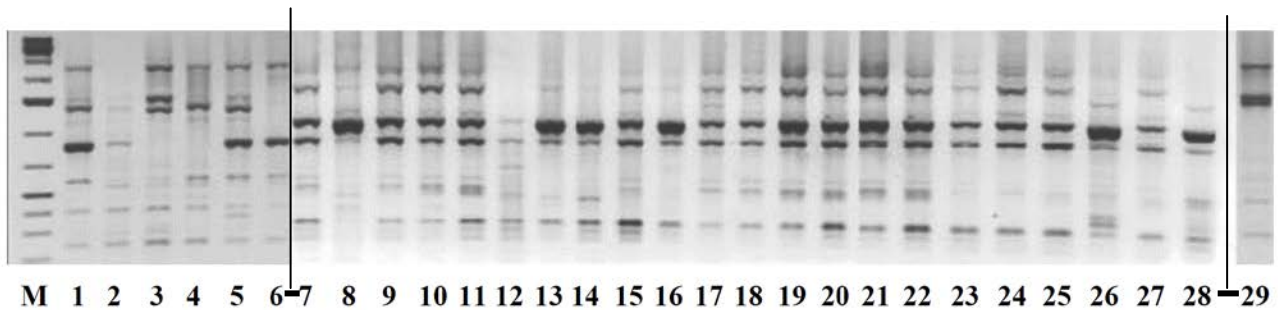

**Fig. S1.** Polymorphism detected by IRAP primer combination. Lanes from left to right: M: 1 kb+DNA marker (Fermentas); 1 to 10: individuals from Euamygdalus section; 11 to 20: individuals from Lycioides section and 21 to 29: individuals from Spartioides section. Black line between lanes showed that were not run together on the original gel. Vertical lines delineate where the gel is cut.

## Supplementary Figure S2

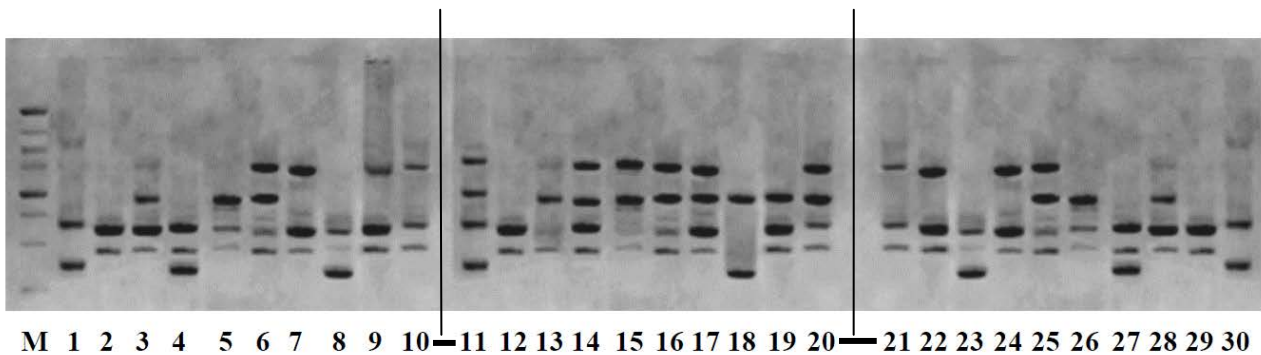

**Fig. S2.** Polymorphism detected by REMAP primer combination. Lanes from left to right: M: 1 kb+DNA marker (Fermentas); 1 to 10: individuals from Euamygdalus section; 11 to 20: individuals from Lycioides section and 21 to 30: individuals from Spartioides section. Black line between lanes showed that were not run together on the original gel. Vertical lines delineate where the gel is cut.
